# Supplementary material
Source: MDPI journal article supplement (https://www.mdpi.com/2227-7102/11/1/10)
Supplement: s1 [file s1]

| Raw data for policy variables |                    |                                     |                       |                         |                     |            |                  |                        |                                  |                    |                   |                   |                           |
|-------------------------------|--------------------|-------------------------------------|-----------------------|-------------------------|---------------------|------------|------------------|------------------------|----------------------------------|--------------------|-------------------|-------------------|---------------------------|
| Code                          | Country            | Cumulative expenditure on education | Student learning time | Public school enrolment | Private expenditure | Class size | Teacher salaries | Teacher qualifications | Teacher professional development | Teacher experience | Teacher induction | Teacher mentoring | Teacher non-contact hours |
| ALB                           | Albania            |                                     |                       | 88.4                    |                     | 27.4       |                  |                        | 57.9                             |                    |                   |                   |                           |
| AUS                           | Australia          | \$ 92 316                           | 26                    | 56.3                    | 18                  | 25.1       | \$ 69 238        | 97.6                   | 84.4                             | 16.7               | 52.6              | 16.7              | 56.44                     |
| AUT                           | Austria            | \$ 132 954                          | 29                    | 87.4                    | 4                   | 24.2       | \$ 42 764        | 84.0                   | 47.6                             |                    |                   |                   |                           |
| BEL                           | Belgium            | \$ 110 315                          | 28                    |                         | 4                   | 19.7       |                  | 98.3                   | 51.9                             | 15.2               | 42.5              | 10.2              | 48.38                     |
| BRA                           | Brazil             |                                     | 25                    | 85.5                    |                     | 36.4       |                  | 87.4                   | 55.1                             | 13.6               | 32.4              | 33.7              | 30.79                     |
| BGR                           | Bulgaria           |                                     | 24                    | 98.8                    |                     | 25.0       | \$ 5 944         | 97.7                   | 47.9                             | 21.5               | 68.9              | 6.1               | 52.82                     |
| CAN                           | Canada             | \$ 94 253                           | 27                    | 90.3                    | 8                   | 26.4       | \$ 64 974        | 98.3                   | 71.2                             | 12.9               | 51.0              | 13.0              | 45.23                     |
| CHL                           | Chile              | \$ 40 607                           | 32                    | 36.9                    | 21                  | 33.8       | \$ 16 099        | 85.7                   | 43.5                             | 15.1               | 36.6              | 4.5               | 8.56                      |
| COL                           | Colombia           |                                     | 27                    | 75.9                    | 23                  | 36.0       | \$ 14 777        |                        | 42.3                             |                    |                   |                   |                           |
| HRV                           | Croatia            | \$ 50 722                           | 26                    | 97.7                    |                     | 24.8       |                  | 94.9                   | 54.9                             | 15.7               | 68.0              | 5.6               | 50.51                     |
| CZE                           | Czech Republic     | \$ 63 575                           | 25                    | 91.8                    | 9                   | 24.0       | \$ 10 534        | 92.6                   | 42.6                             | 17.7               | 45.2              | 3.8               | 54.82                     |
| DNK                           | Denmark            | \$ 103 851                          | 27                    | 76.8                    | 3                   | 21.6       | \$ 62 026        | 93.5                   | 41.2                             | 16.1               | 26.6              | 4.2               | 52.80                     |
| DOM                           | Dominican Republic |                                     | 25                    | 77.7                    |                     | 36.0       | \$ 12 548        |                        | 50.3                             |                    |                   |                   |                           |
| EST                           | Estonia            | \$ 63 857                           | 25                    | 95.8                    | 2                   | 25.1       |                  | 94.4                   | 56.6                             | 21.6               | 19.4              | 3.3               | 42.11                     |
| FIN                           | Finland            | \$ 101 527                          | 24                    | 95.5                    | 1                   | 19.1       | \$ 44 099        | 92.6                   | 51.6                             | 15.5               | 16.3              | 2.8               | 34.81                     |
| FRA                           | France             | \$ 89 435                           | 27                    | 79.0                    | 9                   | 29.3       | \$ 33 807        | 90.1                   | 31.9                             | 17.1               | 55.1              | 3.5               | 49.04                     |
| DEU                           | Germany            | \$ 92 213                           | 26                    | 92.7                    |                     | 25.0       | \$ 63 002        | 88.4                   | 40.1                             |                    |                   |                   |                           |
| GRC                           | Greece             |                                     | 27                    | 95.1                    |                     | 23.5       | \$ 16 566        | 86.9                   | 36.7                             |                    |                   |                   |                           |
| HUN                           | Hungary            | \$ 47 228                           | 26                    | 82.0                    | 8                   | 28.3       | \$ 9 645         |                        | 26.5                             |                    |                   |                   |                           |
| ISL                           | Iceland            | \$ 107 811                          | 26                    | 99.4                    | 4                   | 20.3       |                  | 92.4                   | 66.8                             | 14.3               | 29.5              | 5.8               | 45.71                     |
| IDN                           | Indonesia          |                                     |                       | 59.2                    |                     | 30.9       |                  | 62.7                   | 29.8                             |                    |                   |                   |                           |
| IRL                           | Ireland            | \$ 91 171                           | 28                    | 42.7                    | 5                   | 24.6       | \$ 73 313        | 98.5                   | 44.6                             |                    |                   |                   |                           |
| ITA                           | Italy              | \$ 86 700                           | 29                    | 95.9                    | 4                   | 23.3       | \$ 30 293        | 88.0                   | 33.4                             | 19.8               | 49.4              | 4.5               | 41.16                     |
| JPN                           | Japan              | \$ 93 199                           | 28                    | 68.2                    | 7                   | 36.1       | \$ 46 607        | 97.1                   | 34.8                             | 17.4               | 83.3              | 33.2              | 67.16                     |
| LVA                           | Latvia             | \$ 59 898                           | 25                    | 98.0                    | 2                   | 21.3       |                  | 90.8                   | 49.7                             | 22                 | 35.9              | 4.1               | 46.81                     |
| LTU                           | Lithuania          | \$ 48 389                           | 25                    | 97.7                    | 3                   | 24.1       | \$ 8 266         | 99.3                   | 66.4                             |                    |                   |                   |                           |
| LUX                           | Luxembourg         | \$ 187 458                          | 27                    | 84.4                    |                     | 21.4       | \$ 114 676       | 71.6                   | 51.2                             |                    |                   |                   |                           |
| MEX                           | Mexico             |                                     | 28                    | 87.5                    | 17                  | 39.1       | \$ 19 001        | 61.5                   | 38.9                             | 15.8               | 57.2              | 17.0              | 32.44                     |
| NLD                           | Netherlands        | \$ 99 430                           | 27                    | 39.9                    | 13                  | 25.7       | \$ 61 122        | 91.5                   | 55.5                             | 15.7               | 45.6              | 16.6              | 52.53                     |
| NZL                           | New Zealand        | \$ 80 889                           | 25                    | 93.4                    | 17                  | 25.3       | \$ 45 370        | 96.9                   | 78.2                             | 16.2               | 64.7              | 22.5              |                           |
| NOR                           | Norway             | \$ 135 227                          | 25                    | 98.1                    | 0                   | 23.9       | \$ 55 117        | 92.5                   | 22.9                             | 15.5               | 10.3              | 6.9               | 60.84                     |
| PER                           | Peru               |                                     | 29                    | 68.6                    |                     | 27.7       |                  | 86.7                   | 47.0                             |                    |                   |                   |                           |
| POL                           | Poland             | \$ 67 767                           | 28                    | 96.5                    | 8                   | 24.4       | \$ 12 559        | 99.4                   | 55.9                             | 17.1               | 37.8              | 11.6              | 49.46                     |
| PRT                           | Portugal           | \$ 83 050                           | 28                    | 94.5                    | 12                  | 25.7       | \$ 25 951        | 91.5                   | 36.5                             | 19.4               | 35.5              | 4.3               | 53.47                     |
| ROU                           | Romania            |                                     |                       | 98.9                    |                     | 27.0       |                  | 97.1                   | 63.2                             | 16.5               | 51.2              | 8.0               | 54.62                     |
| RUS                           | Russia             | \$ 51 491                           | 26                    | 99.0                    | 4                   | 22.8       |                  | 88.6                   | 28.7                             | 20.3               | 55.8              | 10.6              |                           |
| SGP                           | Singapore          | \$ 130 611                          | 29                    | 91.6                    |                     | 34.4       | \$ 68 756        | 99.1                   | 82.6                             | 9.7                | 80.0              | 39.6              | 64.08                     |
| SVK                           | Slovak Republic    | \$ 58 381                           | 24                    | 88.4                    | 11                  | 22.1       | \$ 9 653         | 92.1                   | 38.9                             | 17.7               | 60.5              | 4.2               | 46.93                     |
| SVN                           | Slovenia           | \$ 92 850                           | 27                    | 97.4                    | 9                   | 25.9       | \$ 26 326        | 96.1                   | 69.1                             | 16.4               | 72.3              | 18.5              | 49.19                     |
| KOR                           | South Korea        | \$ 79 516                           | 30                    | 65.3                    | 16                  | 31.0       |                  | 97.1                   | 46.8                             |                    |                   |                   |                           |
| ESP                           | Spain              | \$ 74 946                           | 28                    | 68.7                    | 12                  | 26.9       | \$ 36 216        | 97.5                   | 49.9                             | 18.3               | 35.3              | 3.8               | 50.53                     |
| SWE                           | Sweden             | \$ 110 732                          | 26                    | 82.1                    | 0                   | 23.3       | \$ 42 491        | 89.9                   | 71.8                             | 16.4               | 10.7              | 3.7               | 58.49                     |
| CHE                           | Switzerland        | \$ 173 151                          | 25                    | 93.9                    |                     | 20.1       |                  | 80.9                   | 51.5                             |                    |                   |                   |                           |
| THA                           | Thailand           |                                     | 32                    | 85.2                    |                     | 37.1       | \$ 11 165        | 94.7                   | 73.0                             |                    |                   |                   |                           |
| TUR                           | Turkey             |                                     | 26                    | 95.2                    | 13                  | 47.2       | \$ 13 872        | 92.1                   | 24.0                             |                    |                   |                   |                           |
| GBR                           | United Kingdom     | \$ 114 920                          | 26                    | 93.7                    | 16                  | 24.4       |                  | 92.1                   | 80.6                             | 12.4               | 75.8              | 19.1              | 57.30                     |
| USA                           | United States      | \$ 115 179                          | 28                    | 92.3                    | 8                   | 25.8       | \$ 65 095        | 94.9                   | 87.6                             | 13.8               | 59.3              | 12.2              | 40.18                     |
| URY                           | Uruguay            | \$ 31 811                           | 23                    | 84.6                    |                     | 27.2       | \$ 13 238        | 60.4                   | 26.0                             |                    |                   |                   |                           |
| VNM                           | Viet Nam           |                                     |                       | 95.9                    |                     | 40.1       |                  | 85.6                   | 60.4                             |                    |                   |                   |                           |
| Average (ALL countries)       |                    | \$ 90 484                           | 26.8                  | 84.6                    | 8.9                 | 27.3       | \$ 36 621        | 90.2                   | 51.0                             | 16.6               | 47.2              | 11.4              | 48.18                     |
| Average (OECD)                |                    | \$ 94 043                           | 26.9                  | 84.6                    | 9.0                 | 26.1       | \$ 40 350        | 91.2                   | 50.9                             | 16.6               | 44.6              | 10.4              | 50.00                     |
