# Supplementary material
Source: MDPI journal article supplement (https://www.mdpi.com/2227-7102/11/1/10)
Supplement: s1 [file s1]

## Raw data for culture variables

| Code                             | Country            | Power distance | Individualism vs<br>collectivism | Competitiveness | Uncertainty<br>avoidance | Long term<br>planning | Indulgence |
|----------------------------------|--------------------|----------------|----------------------------------|-----------------|--------------------------|-----------------------|------------|
| ALB                              | Albania            | 90             | 20                               | 80              | 70                       | 61                    | 15         |
| AUS                              | Australia          | 36             | 90                               | 61              | 51                       | 21                    | 71         |
| AUT                              | Austria            | 11             | 55                               | 79              | 70                       | 60                    | 63         |
| BEL                              | Belgium            | 65             | 75                               | 54              | 94                       | 82                    | 57         |
| BRA                              | Brazil             | 69             | 38                               | 49              | 76                       | 44                    | 59         |
| BGR                              | Bulgaria           | 70             | 30                               | 40              | 85                       | 69                    | 16         |
| CAN                              | Canada             | 39             | 80                               | 52              | 48                       | 6                     | 68         |
| CHL                              | Chile              | 63             | 23                               | 28              | 86                       | 31                    | 68         |
| COL                              | Colombia           | 67             | 13                               | 64              | 80                       | 13                    | 83         |
| HRV                              | Croatia            | 73             | 33                               | 40              | 80                       | 58                    | 33         |
| CZE                              | Czech Republic     | 57             | 58                               | 57              | 74                       | 70                    | 29         |
| DNK                              | Denmark            | 18             | 74                               | 16              | 23                       | 35                    | 70         |
| DOM                              | Dominican Republic | 65             | 30                               | 65              | 45                       | 13                    | 54         |
| EST                              | Estonia            | 40             | 60                               | 30              | 60                       | 82                    | 16         |
| FIN                              | Finland            | 33             | 63                               | 26              | 59                       | 38                    | 57         |
| FRA                              | France             | 68             | 71                               | 43              | 86                       | 63                    | 48         |
| DEU                              | Germany            | 35             | 67                               | 66              | 65                       | 83                    | 40         |
| GRC                              | Greece             | 60             | 35                               | 57              | 100                      | 45                    | 50         |
| HUN                              | Hungary            | 46             | 80                               | 88              | 82                       | 58                    | 31         |
| ISL                              | Iceland            | 30             | 60                               | 10              | 50                       | 28                    | 67         |
| IDN                              | Indonesia          | 78             | 14                               | 46              | 48                       | 62                    | 38         |
| IRL                              | Ireland            | 28             | 70                               | 68              | 35                       | 24                    | 65         |
| ITA                              | Italy              | 50             | 76                               | 70              | 75                       | 61                    | 30         |
| JPN                              | Japan              | 54             | 46                               | 95              | 92                       | 88                    | 42         |
| LVA                              | Latvia             | 44             | 70                               | 9               | 63                       | 69                    | 13         |
| LTU                              | Lithuania          | 42             | 60                               | 19              | 65                       | 82                    | 16         |
| LUX                              | Luxembourg         | 40             | 60                               | 50              | 70                       | 64                    | 56         |
| MEX                              | Mexico             | 81             | 30                               | 69              | 82                       | 24                    | 97         |
| NLD                              | Netherlands        | 38             | 80                               | 14              | 53                       | 67                    | 68         |
| NZL                              | New Zealand        | 22             | 79                               | 58              | 49                       | 33                    | 75         |
| NOR                              | Norway             | 31             | 69                               | 8               | 50                       | 35                    | 55         |
| PER                              | Peru               | 64             | 16                               | 42              | 87                       | 25                    | 46         |
| POL                              | Poland             | 68             | 60                               | 64              | 93                       | 38                    | 29         |
| PRT                              | Portugal           | 63             | 27                               | 31              | 99                       | 28                    | 33         |
| ROU                              | Romania            | 90             | 30                               | 42              | 90                       | 52                    | 20         |
| RUS                              | Russia             | 93             | 39                               | 36              | 95                       | 81                    | 20         |
| SGP                              | Singapore          | 74             | 20                               | 48              | 8                        | 72                    | 46         |
| SVK                              | Slovak Republic    | 100            | 52                               | 100             | 51                       | 77                    | 28         |
| SVN                              | Slovenia           | 71             | 27                               | 19              | 88                       | 49                    | 48         |
| KOR                              | South Korea        | 60             | 18                               | 39              | 85                       | 100                   | 29         |
| ESP                              | Spain              | 57             | 51                               | 42              | 86                       | 48                    | 44         |
| SWE                              | Sweden             | 31             | 71                               | 5               | 29                       | 53                    | 78         |
| CHE                              | Switzerland        | 34             | 68                               | 70              | 58                       | 74                    | 66         |
| THA                              | Thailand           | 64             | 20                               | 34              | 64                       | 32                    | 45         |
| TUR                              | Turkey             | 66             | 37                               | 45              | 85                       | 46                    | 49         |
| GBR                              | United Kingdom     | 35             | 89                               | 66              | 35                       | 51                    | 69         |
| USA                              | United States      | 40             | 91                               | 62              | 46                       | 26                    | 68         |
| URY                              | Uruguay            | 61             | 36                               | 38              | 99                       | 26                    | 53         |
| VNM                              | Viet Nam           | 70             | 20                               | 40              | 30                       | 57                    | 35         |
| Average (all countries in index) |                    | 64             | 39                               | 47              | 65                       | 43                    | 48         |
| Average (included countries)     |                    | 55             | 51                               | 48              | 67                       | 51                    | 48         |
| Hofstede's establish cut off     |                    | 50             | 50                               | 50              | 50                       | 50                    | 50         |

## Calibrated data for culture conditions

| Code                       | Country            | HIPOWER | HIINDIV | HICOMPET | HIUNCERT | HILONG | HIINDULG |
|----------------------------|--------------------|---------|---------|----------|----------|--------|----------|
| ALB                        | Albania            | 1       | 0       | 1        | 1        | 1      | 0        |
| AUS                        | Australia          | 0       | 1       | 1        | 1        | 0      | 1        |
| AUT                        | Austria            | 0       | 1       | 1        | 1        | 1      | 1        |
| BEL                        | Belgium            | 1       | 1       | 1        | 1        | 1      | 1        |
| BRA                        | Brazil             | 1       | 0       | 0        | 1        | 0      | 1        |
| BGR                        | Bulgaria           | 1       | 0       | 0        | 1        | 1      | 0        |
| CAN                        | Canada             | 0       | 1       | 1        | 0        | 0      | 1        |
| CHL                        | Chile              | 1       | 0       | 0        | 1        | 0      | 1        |
| COL                        | Colombia           | 1       | 0       | 1        | 1        | 0      | 1        |
| HRV                        | Croatia            | 1       | 0       | 0        | 1        | 1      | 0        |
| CZE                        | Czech Republic     | 1       | 1       | 1        | 1        | 1      | 0        |
| DNK                        | Denmark            | 0       | 1       | 0        | 0        | 0      | 1        |
| DOM                        | Dominican Republic | 1       | 0       | 1        | 0        | 0      | 1        |
| EST                        | Estonia            | 0       | 1       | 0        | 1        | 1      | 0        |
| FIN                        | Finland            | 0       | 1       | 0        | 1        | 0      | 1        |
| FRA                        | France             | 1       | 1       | 0        | 1        | 1      | 0        |
| DEU                        | Germany            | 0       | 1       | 1        | 1        | 1      | 0        |
| GRC                        | Greece             | 1       | 0       | 1        | 1        | 0      | 0        |
| HUN                        | Hungary            | 0       | 1       | 1        | 1        | 1      | 0        |
| ISL                        | Iceland            | 0       | 1       | 0        | 0        | 0      | 1        |
| IDN                        | Indonesia          | 1       | 0       | 0        | 0        | 1      | 0        |
| IRL                        | Ireland            | 0       | 1       | 1        | 0        | 0      | 1        |
| ITA                        | Italy              | 0       | 1       | 1        | 1        | 1      | 0        |
| JPN                        | Japan              | 1       | 0       | 1        | 1        | 1      | 0        |
| LVA                        | Latvia             | 0       | 1       | 0        | 1        | 1      | 0        |
| LTU                        | Lithuania          | 0       | 1       | 0        | 1        | 1      | 0        |
| LUX                        | Luxembourg         | 0       | 1       | 0        | 1        | 1      | 1        |
| MEX                        | Mexico             | 1       | 0       | 1        | 1        | 0      | 1        |
| NLD                        | Netherlands        | 0       | 1       | 0        | 1        | 1      | 1        |
| NZL                        | New Zealand        | 0       | 1       | 1        | 0        | 0      | 1        |
| NOR                        | Norway             | 0       | 1       | 0        | 0        | 0      | 1        |
| PER                        | Peru               | 1       | 0       | 0        | 1        | 0      | 0        |
| POL                        | Poland             | 1       | 1       | 1        | 1        | 0      | 0        |
| PRT                        | Portugal           | 1       | 0       | 0        | 1        | 0      | 0        |
| ROU                        | Romania            | 1       | 0       | 0        | 1        | 1      | 0        |
| RUS                        | Russia             | 1       | 0       | 0        | 1        | 1      | 0        |
| SGP                        | Singapore          | 1       | 0       | 0        | 0        | 1      | 0        |
| SVK                        | Slovak Republic    | 1       | 1       | 1        | 1        | 1      | 0        |
| SVN                        | Slovenia           | 1       | 0       | 0        | 1        | 0      | 0        |
| KOR                        | South Korea        | 1       | 0       | 0        | 1        | 1      | 0        |
| ESP                        | Spain              | 1       | 1       | 0        | 1        | 0      | 0        |
| SWE                        | Sweden             | 0       | 1       | 0        | 0        | 1      | 1        |
| CHE                        | Switzerland        | 0       | 1       | 1        | 1        | 1      | 1        |
| THA                        | Thailand           | 1       | 0       | 0        | 1        | 0      | 0        |
| TUR                        | Turkey             | 1       | 0       | 0        | 1        | 0      | 0        |
| GBR                        | United Kingdom     | 0       | 1       | 1        | 0        | 1      | 1        |
| USA                        | United States      | 0       | 1       | 1        | 0        | 0      | 1        |
| URY                        | Uruguay            | 1       | 0       | 0        | 1        | 0      | 1        |
| VNM                        | Viet Nam           | 1       | 0       | 0        | 0        | 1      | 0        |
| NUMBER OF COUNTRIES IN SET |                    | 28      | 27      | 21       | 36       | 26     | 22       |
