# Supplementary material
Source: MDPI journal article supplement (https://www.mdpi.com/2227-7102/11/1/10)
Supplement: s1 [file s1]

Raw data for macro variables

| Code                             | Country            | Population | GDP per cap. | 80/20 index | Democracy Index | Human Development Index | Gender Inequality Index | Gender Gap | Index of Economic Freedom | International migrant stock (10-14 years) | Index of ethnic fractionalization | Index of language fractionalization | Index of religious fractionalization |
|----------------------------------|--------------------|------------|--------------|-------------|-----------------|-------------------------|-------------------------|------------|---------------------------|-------------------------------------------|-----------------------------------|-------------------------------------|--------------------------------------|
| ALB                              | Albania            | 3,197      | \$ 3,945     | 4.27        | 5.91            | 0.764                   | 0.267                   | 0.701      | 65.7                      | 1.2                                       | 0.2204                            | 0.0399                              | 0.4719                               |
| AUS                              | Australia          | 23,923     | \$ 56,291    | 5.95        | 9.01            | 0.939                   | 0.120                   | 0.733      | 81.4                      | 13.3                                      | 0.0929                            | 0.3349                              | 0.8211                               |
| AUT                              | Austria            | 8,558      | \$ 43,637    | 4.94        | 8.54            | 0.893                   | 0.078                   | 0.733      | 71.2                      | 9.2                                       | 0.1068                            | 0.1522                              | 0.4146                               |
| BEL                              | Belgium            | 11,183     | \$ 40,454    | 4.22        | 7.93            | 0.896                   | 0.073                   | 0.753      | 68.8                      | 10.4                                      | 0.5554                            | 0.5409                              | 0.2127                               |
| BRA                              | Brazil             | 203,652    | \$ 8,677     | 15.55       | 6.96            | 0.754                   | 0.414                   | 0.686      | 56.6                      | 0.2                                       | 0.5408                            | 0.0468                              | 0.6054                               |
| BGR                              | Bulgaria           | 7,112      | \$ 6,993     | 6.93        | 7.14            | 0.794                   | 0.223                   | 0.722      | 66.8                      | 0.9                                       | 0.4201                            | 0.3031                              | 0.5965                               |
| CAN                              | Canada             | 35,871     | \$ 43,316    | 5.77        | 9.08            | 0.920                   | 0.098                   | 0.740      | 79.1                      | 12.9                                      | 0.7124                            | 0.5772                              | 0.6958                               |
| CHL                              | Chile              | 17,924     | \$ 13,416    | 12.25       | 7.84            | 0.847                   | 0.322                   | 0.698      | 78.5                      | 2.1                                       | 0.1861                            | 0.1871                              | 0.3841                               |
| COL                              | Colombia           | 49,529     | \$ 6,056     | 17.29       | 6.62            | 0.727                   | 0.393                   | 0.725      | 71.7                      | 0.3                                       | 0.6014                            | 0.0193                              | 0.1478                               |
| HRV                              | Croatia            | 4,255      | \$ 11,593    | 5.75        | 6.93            | 0.827                   | 0.141                   | 0.708      | 61.5                      | 3.9                                       | 0.3690                            | 0.0763                              | 0.4447                               |
| CZE                              | Czech Republic     | 10,777     | \$ 17,557    | 3.78        | 7.94            | 0.878                   | 0.129                   | 0.687      | 72.5                      | 1.6                                       | 0.3222                            | 0.3233                              | 0.6591                               |
| DNK                              | Denmark            | 5,662      | \$ 53,014    | 4.46        | 9.11            | 0.925                   | 0.041                   | 0.767      | 76.3                      | 5.0                                       | 0.0819                            | 0.1049                              | 0.2333                               |
| DOM                              | Dominican Republic | 10,652     | \$ 6,468     | 10.77       | 6.67            | 0.722                   | 0.470                   | 0.686      | 61.0                      | 1.8                                       | 0.4294                            | 0.0395                              | 0.3118                               |
| EST                              | Estonia            | 1,280      | \$ 17,085    | 5.69        | 7.85            | 0.865                   | 0.131                   | 0.749      | 76.8                      | 1.6                                       | 0.5062                            | 0.4944                              | 0.4985                               |
| FIN                              | Finland            | 5,461      | \$ 42,403    | 3.89        | 9.03            | 0.895                   | 0.056                   | 0.850      | 73.4                      | 4.6                                       | 0.1315                            | 0.1412                              | 0.2531                               |
| FRA                              | France             | 64,983     | \$ 36,352    | 5.28        | 7.92            | 0.897                   | 0.102                   | 0.761      | 62.5                      | 5.0                                       | 0.1032                            | 0.1221                              | 0.4029                               |
| DEU                              | Germany            | 82,562     | \$ 41,178    | 4.61        | 8.64            | 0.926                   | 0.066                   | 0.779      | 73.8                      | 3.9                                       | 0.1682                            | 0.1642                              | 0.6571                               |
| GRC                              | Greece             | 11,125     | \$ 18,007    | 7.62        | 7.45            | 0.866                   | 0.119                   | 0.685      | 54.0                      | 5.4                                       | 0.1576                            | 0.0300                              | 0.1530                               |
| HUN                              | Hungary            | 9,911      | \$ 12,366    | 4.95        | 6.84            | 0.836                   | 0.252                   | 0.672      | 66.8                      | 2.4                                       | 0.1522                            | 0.0297                              | 0.5244                               |
| ISL                              | Iceland            | 337        | \$ 50,722    | 3.97        | 9.58            | 0.921                   | 0.051                   | 0.881      | 72.0                      | 10.0                                      | 0.0798                            | 0.0820                              | 0.1913                               |
| IDN                              | Indonesia          | 255,709    | \$ 3,346     | 6.56        | 7.03            | 0.689                   | 0.467                   | 0.681      | 58.1                      | 0.1                                       | 0.7351                            | 0.7680                              | 0.2340                               |
| IRL                              | Ireland            | 4,727      | \$ 61,094    | 5.25        | 8.85            | 0.923                   | 0.127                   | 0.807      | 76.6                      | 13.5                                      | 0.1206                            | 0.0312                              | 0.1550                               |
| ITA                              | Italy              | 61,142     | \$ 29,993    | 6.69        | 7.98            | 0.887                   | 0.085                   | 0.726      | 61.7                      | 6.6                                       | 0.1145                            | 0.1147                              | 0.3027                               |
| JPN                              | Japan              | 126,818    | \$ 34,524    | 5.39        | 7.96            | 0.903                   | 0.116                   | 0.670      | 73.3                      | 1.0                                       | 0.0119                            | 0.0178                              | 0.5406                               |
| LVA                              | Latvia             | 2,031      | \$ 13,655    | 6.69        | 7.37            | 0.830                   | 0.191                   | 0.752      | 69.7                      | 0.9                                       | 0.5867                            | 0.5795                              | 0.5556                               |
| LTU                              | Lithuania          | 2,999      | \$ 14,252    | 6.45        | 7.54            | 0.848                   | 0.121                   | 0.740      | 74.7                      | 1.1                                       | 0.3223                            | 0.3219                              | 0.4141                               |
| LUX                              | Luxembourg         | 543        | \$ 99,718    | 5.93        | 8.88            | 0.898                   | 0.075                   | 0.738      | 73.2                      | 26.2                                      | 0.5302                            | 0.6440                              | 0.0911                               |
| MEX                              | Mexico             | 125,236    | \$ 9,005     | 10.75       | 6.55            | 0.762                   | 0.345                   | 0.699      | 66.4                      | 1.3                                       | 0.5418                            | 0.1511                              | 0.1796                               |
| NLD                              | Netherlands        | 16,844     | \$ 44,291    | 4.18        | 8.92            | 0.924                   | 0.044                   | 0.776      | 73.7                      | 4.6                                       | 0.1054                            | 0.5143                              | 0.7222                               |
| NZL                              | New Zealand        | 4,596      | \$ 37,808    | 5.71        | 9.26            | 0.915                   | 0.158                   | 0.782      | 82.1                      | 15.3                                      | 0.3969                            | 0.1657                              | 0.8110                               |
| NOR                              | Norway             | 5,143      | \$ 74,482    | 3.80        | 9.93            | 0.949                   | 0.053                   | 0.850      | 71.8                      | 10.1                                      | 0.0586                            | 0.0673                              | 0.2048                               |
| PER                              | Peru               | 31,161     | \$ 6,027     | 10.77       | 6.58            | 0.740                   | 0.385                   | 0.683      | 67.7                      | 0.3                                       | 0.6566                            | 0.3358                              | 0.1988                               |
| POL                              | Poland             | 38,222     | \$ 12,559    | 5.03        | 7.09            | 0.855                   | 0.137                   | 0.715      | 68.6                      | 0.7                                       | 0.1183                            | 0.0468                              | 0.1712                               |
| PRT                              | Portugal           | 10,610     | \$ 19,223    | 6.70        | 7.79            | 0.843                   | 0.091                   | 0.731      | 65.3                      | 4.0                                       | 0.0468                            | 0.0198                              | 0.1438                               |
| ROU                              | Romania            | 21,579     | \$ 8,981     | 4.10        | 6.68            | 0.802                   | 0.339                   | 0.693      | 66.6                      | 1.1                                       | 0.3069                            | 0.1723                              | 0.2373                               |
| RUS                              | Russia             | 142,098    | \$ 9,329     | 8.19        | 3.31            | 0.804                   | 0.271                   | 0.694      | 52.1                      | 3.0                                       | 0.2452                            | 0.2485                              | 0.4398                               |
| SGP                              | Singapore          | 5,619      | \$ 52,889    | 8.40        | 6.14            | 0.925                   | 0.068                   | 0.711      | 89.4                      | 26.7                                      | 0.3857                            | 0.3835                              | 0.6561                               |
| SVK                              | Slovak Republic    | 5,458      | \$ 16,089    | 4.05        | 7.29            | 0.845                   | 0.179                   | 0.675      | 67.2                      | 1.3                                       | 0.2539                            | 0.2551                              | 0.5655                               |
| SVN                              | Slovenia           | 2,079      | \$ 20,729    | 3.73        | 7.57            | 0.890                   | 0.053                   | 0.784      | 60.3                      | 4.4                                       | 0.2216                            | 0.2201                              | 0.2868                               |
| KOR                              | South Korea        | 49,750     | \$ 27,222    | 5.83        | 7.97            | 0.901                   | 0.067                   | 0.651      | 71.5                      | 0.4                                       | 0.0020                            | 0.0021                              | 0.6604                               |
| ESP                              | Spain              | 47,199     | \$ 25,685    | 7.26        | 8.30            | 0.884                   | 0.081                   | 0.742      | 67.6                      | 11.2                                      | 0.4165                            | 0.4132                              | 0.4514                               |
| SWE                              | Sweden             | 9,694      | \$ 50,585    | 4.16        | 9.45            | 0.913                   | 0.048                   | 0.823      | 72.7                      | 11.1                                      | 0.0600                            | 0.1968                              | 0.2342                               |
| CHE                              | Switzerland        | 8,239      | \$ 80,999    | 4.92        | 9.05            | 0.939                   | 0.040                   | 0.785      | 80.5                      | 15.2                                      | 0.5314                            | 0.5441                              | 0.6083                               |
| THA                              | Thailand           | 67,401     | \$ 5,815     | 6.51        | 5.09            | 0.740                   | 0.366                   | 0.706      | 62.4                      | 2.5                                       | 0.6338                            | 0.6344                              | 0.0994                               |
| TUR                              | Turkey             | 76,691     | \$ 9,126     | 7.98        | 5.12            | 0.767                   | 0.328                   | 0.624      | 63.2                      | 3.5                                       | 0.3200                            | 0.2216                              | 0.0049                               |
| GBR                              | United Kingdom     | 63,844     | \$ 43,930    | 5.34        | 8.31            | 0.909                   | 0.131                   | 0.758      | 75.8                      | 8.1                                       | 0.1211                            | 0.0532                              | 0.6944                               |
| USA                              | United States      | 325,127    | \$ 56,116    | 9.10        | 8.05            | 0.920                   | 0.203                   | 0.740      | 76.2                      | 7.3                                       | 0.4901                            | 0.2514                              | 0.8241                               |
| URY                              | Uruguay            | 3,430      | \$ 15,574    | 9.09        | 8.17            | 0.795                   | 0.284                   | 0.679      | 68.6                      | 1.4                                       | 0.2504                            | 0.0817                              | 0.3548                               |
| VNM                              | Viet Nam           | 93,387     | \$ 2,111     | 6.77        | 3.53            | 0.683                   | 0.337                   | 0.687      | 51.7                      | 0.1                                       | 0.2383                            | 0.2377                              | 0.5080                               |
| Average (all countries in index) |                    | 36,782     | \$ 12,942    | 8.42        | 5.55            | 0.699                   | 0.360                   | 0.695      | 60.3                      | 5.2                                       | 0.4408                            | 0.3929                              | 0.4369                               |
| Average (included countries)     |                    | 44,394     | \$ 28,871    | 6.60        | 7.61            | 0.853                   | 0.178                   | 0.731      | 69.4                      | 5.7                                       | 0.3012                            | 0.2347                              | 0.4088                               |
| Average (OECD) (cutoff for set)  |                    | 34,848     | \$ 38,888    | 5.89        | 8.13            | 0.888                   | 0.123                   | 0.744      | 71.3                      | 7.3                                       | 0.2500                            | 0.2345                              | 0.4187                               |

| Calibrated data for macro conditions |                    |       |         |       |          |         |       |           |       |              |            |           |
|--------------------------------------|--------------------|-------|---------|-------|----------|---------|-------|-----------|-------|--------------|------------|-----------|
| Code                                 | Country            | LOPOP | HIGENEQ | HIHDI | HIGDPCAP | HIINCEQ | HIDEM | HIECOFREE | LOIMM | LOETHNICFRAC | LOLANGFRAC | LORELFRAC |
| ALB                                  | Albania            | 1     | 0       | 0     | 0        | 1       | 0     | 0         | 1     | 1            | 1          | 0         |
| AUS                                  | Australia          | 1     | 1       | 1     | 1        | 0       | 1     | 1         | 0     | 1            | 0          | 0         |
| AUT                                  | Austria            | 1     | 1       | 1     | 1        | 1       | 1     | 0         | 0     | 1            | 1          | 1         |
| BEL                                  | Belgium            | 1     | 1       | 1     | 1        | 1       | 0     | 0         | 0     | 0            | 0          | 1         |
| BRA                                  | Brazil             | 0     | 0       | 0     | 0        | 0       | 0     | 0         | 1     | 0            | 1          | 0         |
| BGR                                  | Bulgaria           | 1     | 0       | 0     | 0        | 0       | 0     | 0         | 1     | 0            | 0          | 0         |
| CAN                                  | Canada             | 0     | 1       | 1     | 1        | 1       | 1     | 1         | 0     | 0            | 0          | 0         |
| CHL                                  | Chile              | 1     | 0       | 0     | 0        | 0       | 0     | 1         | 1     | 1            | 1          | 1         |
| COL                                  | Colombia           | 0     | 0       | 0     | 0        | 0       | 0     | 1         | 1     | 0            | 1          | 1         |
| HRV                                  | Croatia            | 1     | 0       | 0     | 0        | 1       | 0     | 0         | 1     | 0            | 1          | 0         |
| CZE                                  | Czech Republic     | 1     | 0       | 0     | 0        | 1       | 0     | 1         | 1     | 0            | 0          | 0         |
| DNK                                  | Denmark            | 1     | 1       | 1     | 1        | 1       | 1     | 1         | 1     | 1            | 1          | 1         |
| DOM                                  | Dominican Republic | 1     | 0       | 0     | 0        | 0       | 0     | 0         | 1     | 0            | 1          | 1         |
| EST                                  | Estonia            | 1     | 1       | 0     | 0        | 1       | 0     | 1         | 1     | 0            | 0          | 0         |
| FIN                                  | Finland            | 1     | 1       | 1     | 1        | 1       | 1     | 1         | 1     | 1            | 1          | 1         |
| FRA                                  | France             | 0     | 1       | 1     | 0        | 1       | 0     | 0         | 1     | 1            | 1          | 1         |
| DEU                                  | Germany            | 0     | 1       | 1     | 1        | 1       | 1     | 1         | 1     | 1            | 1          | 0         |
| GRC                                  | Greece             | 1     | 1       | 0     | 0        | 0       | 0     | 0         | 1     | 1            | 1          | 1         |
| HUN                                  | Hungary            | 1     | 0       | 0     | 0        | 1       | 0     | 0         | 1     | 1            | 1          | 0         |
| ISL                                  | Iceland            | 1     | 1       | 1     | 1        | 1       | 1     | 1         | 0     | 1            | 1          | 1         |
| IDN                                  | Indonesia          | 0     | 0       | 0     | 0        | 0       | 0     | 0         | 1     | 0            | 0          | 1         |
| IRL                                  | Ireland            | 1     | 1       | 1     | 1        | 1       | 1     | 1         | 0     | 1            | 1          | 1         |
| ITA                                  | Italy              | 0     | 1       | 0     | 0        | 0       | 0     | 0         | 1     | 1            | 1          | 1         |
| JPN                                  | Japan              | 0     | 1       | 1     | 0        | 1       | 0     | 1         | 1     | 1            | 1          | 0         |
| LVA                                  | Latvia             | 1     | 1       | 0     | 0        | 0       | 0     | 0         | 1     | 0            | 0          | 0         |
| LTU                                  | Lithuania          | 1     | 1       | 0     | 0        | 0       | 0     | 1         | 1     | 0            | 0          | 1         |
| LUX                                  | Luxembourg         | 1     | 1       | 1     | 1        | 0       | 1     | 1         | 0     | 0            | 0          | 1         |
| MEX                                  | Mexico             | 0     | 0       | 0     | 0        | 0       | 0     | 0         | 1     | 0            | 1          | 1         |
| NLD                                  | Netherlands        | 1     | 1       | 1     | 1        | 1       | 1     | 1         | 1     | 1            | 0          | 0         |
| NZL                                  | New Zealand        | 1     | 1       | 1     | 0        | 1       | 1     | 1         | 0     | 0            | 1          | 0         |
| NOR                                  | Norway             | 1     | 1       | 1     | 1        | 1       | 1     | 1         | 0     | 1            | 1          | 1         |
| PER                                  | Peru               | 1     | 0       | 0     | 0        | 0       | 0     | 0         | 1     | 0            | 0          | 1         |
| POL                                  | Poland             | 0     | 0       | 0     | 0        | 1       | 0     | 0         | 1     | 1            | 1          | 1         |
| PRT                                  | Portugal           | 1     | 1       | 0     | 0        | 0       | 0     | 0         | 1     | 1            | 1          | 1         |
| ROU                                  | Romania            | 1     | 0       | 0     | 0        | 1       | 0     | 0         | 1     | 0            | 1          | 1         |
| RUS                                  | Russia             | 0     | 0       | 0     | 0        | 0       | 0     | 0         | 1     | 1            | 0          | 0         |
| SGP                                  | Singapore          | 1     | 1       | 1     | 1        | 0       | 0     | 1         | 0     | 0            | 0          | 0         |
| SVK                                  | Slovak Republic    | 1     | 0       | 0     | 0        | 1       | 0     | 0         | 1     | 0            | 0          | 0         |
| SVN                                  | Slovenia           | 1     | 1       | 1     | 0        | 1       | 0     | 0         | 1     | 1            | 1          | 1         |
| KOR                                  | South Korea        | 0     | 1       | 1     | 0        | 1       | 0     | 1         | 1     | 1            | 1          | 0         |
| ESP                                  | Spain              | 0     | 1       | 0     | 0        | 0       | 1     | 0         | 0     | 0            | 0          | 0         |
| SWE                                  | Sweden             | 1     | 1       | 1     | 1        | 1       | 1     | 1         | 0     | 1            | 1          | 1         |
| CHE                                  | Switzerland        | 1     | 1       | 1     | 1        | 1       | 1     | 1         | 0     | 0            | 0          | 0         |
| THA                                  | Thailand           | 0     | 0       | 0     | 0        | 0       | 0     | 0         | 1     | 0            | 0          | 1         |
| TUR                                  | Turkey             | 0     | 0       | 0     | 0        | 0       | 0     | 0         | 1     | 0            | 1          | 1         |
| GBR                                  | United Kingdom     | 0     | 1       | 1     | 1        | 1       | 1     | 1         | 0     | 1            | 1          | 0         |
| USA                                  | United States      | 0     | 0       | 1     | 1        | 0       | 1     | 1         | 0     | 0            | 0          | 0         |
| URY                                  | Uruguay            | 1     | 0       | 0     | 0        | 0       | 1     | 0         | 1     | 0            | 1          | 1         |
| VNM                                  | Viet Nam           | 0     | 0       | 0     | 0        | 0       | 0     | 0         | 1     | 1            | 0          | 0         |
| NUMBER OF COUNTRIES IN SET           |                    | 31    | 28      | 22    | 17       | 26      | 18    | 23        | 34    | 24           | 29         | 26        |
