# Supplementary material
Source: MDPI journal article supplement (https://www.mdpi.com/2227-7102/11/1/10)
Supplement: s1 [file s1]

Table A5

| Comparison of means and correlations when grouped by level of human development |                           |                 |                              |                                  |                              |                                      |                              |                                   |                                        |
|---------------------------------------------------------------------------------|---------------------------|-----------------|------------------------------|----------------------------------|------------------------------|--------------------------------------|------------------------------|-----------------------------------|----------------------------------------|
|                                                                                 | All countries             |                 |                              | High human development countries |                              | NOT high human development countries |                              | Comparison between groups         |                                        |
|                                                                                 | Number of tests in sample | Mean (sd)       | Correlation with PISA scores | Mean (sd)                        | Correlation with PISA scores | Mean (sd)                            | Correlation with PISA scores | Difference in means Cohen's D (a) | Difference in correlations Z-score (b) |
|                                                                                 | 147                       | 475.9 (44.6)    | -                            | 505.5 (17.3)                     | -                            | 449.8 (45.0)                         | -                            | -1.598***                         | -                                      |
| PISA scores                                                                     |                           |                 |                              |                                  |                              |                                      |                              |                                   |                                        |
| Cumulative expenditure on education (\$)                                        | 108                       | 90,484 (34,108) | 0.418***                     | 109,379 (26,894)                 | -0.173                       | 57,056 (13,649)                      | 0.725***                     | -2.271***                         | -5.275***                              |
| Student hours in classroom                                                      | 135                       | 26.8 (1.9)      | 0.025                        | 27.0 (1.5)                       | 0.105                        | 26.6 (2.3)                           | -0.096                       | -0.212                            | 1.145                                  |
| Class size in language of instruction class                                     | 147                       | 27.3 (6.0)      | -0.451***                    | 25.0 (4.3)                       | 0.539***                     | 29.38 (6.6)                          | -0.499***                    | 0.780***                          | 6.818***                               |
| Public school enrolment rate (%)                                                | 141                       | 83.4 (17.0)     | 0.075                        | 80.3 (18.9)                      | -0.079                       | 86.2 (14.8)                          | 0.421***                     | 0.350*                            | -3.061**                               |
| Private expenditure on primary and secondary education (% of total)             | 105                       | 8.8 (6.1)       | -0.444***                    | 7.7 (5.7)                        | 0.196                        | 10.4 (6.5)                           | -0.764***                    | 0.440*                            | 5.555***                               |
| Teacher salaries (\$)                                                           | 102                       | 36,621 (25,776) | 0.567***                     | 56,060 (20,034)                  | -0.025                       | 14,752 (7,254)                       | 0.230                        | -2.681***                         | -1.267                                 |
| Qualified teachers (%)                                                          | 138                       | 89.5 (9.2)      | 0.483***                     | 91.1 (6.2)                       | 0.515***                     | 87.9 (11.3)                          | 0.489***                     | 0.346*                            | 0.200                                  |
| Teacher professional development in previous 3 months (%)                       | 147                       | 50.6 (16.5)     | 0.237**                      | 56.4 (18.6)                      | 0.103                        | 45.5 (12.4)                          | 0.021                        | -0.699***                         | 0.488                                  |
| Average years of teacher experience                                             | 93                        | 16.6 (2.7)      | -0.106                       | 15.4 (2.2)                       | -0.440**                     | 18.0 (2.6)                           | 0.606***                     | 1.117***                          | -5.450***                              |
| Teachers that participated in an induction program (%)                          | 93                        | 47.2 (19.5)     | 0.037                        | 48.5 (22.9)                      | 0.328*                       | 45.7 (14.4)                          | -0.330*                      | -0.144                            | 3.170**                                |
| Teachers that have a mentor (%)                                                 | 93                        | 11.4 (9.7)      | 0.095                        | 13.7 (10.4)                      | 0.649***                     | 8.6 (8.0)                            | -0.658***                    | -0.540**                          | 7.250***                               |
| Teacher non-contact hours (% of total)                                          | 87                        | 48 (11)         | 0.508***                     | 51 (9)                           | 0.383**                      | 44 (13)                              | 0.442**                      | -0.664**                          | -0.318                                 |

\*\*\*  $p < .001$ ; \*\*  $p < .01$ ; \*  $p < .05$

**NOTES** (a) Cohen's D magnitude of the difference between means, Welch two sample t-test for significance of difference  
(b) Fisher's r to z transformation, and comparison of z-scores for the magnitude and significance of difference between correlations
