# Supplementary material
Source: MDPI journal article supplement (https://www.mdpi.com/2227-7102/11/1/10)
Supplement: s1 [file s1]

Table A7

| Comparison of means and correlations when grouped by level of individualism |                           |                 |                              |                              |                              |                                  |                              |                                   |                                        |
|-----------------------------------------------------------------------------|---------------------------|-----------------|------------------------------|------------------------------|------------------------------|----------------------------------|------------------------------|-----------------------------------|----------------------------------------|
|                                                                             | All countries             |                 |                              | High individualism countries |                              | NOT high individualism countries |                              | Comparison between groups         |                                        |
|                                                                             | Number of tests in sample | Mean (sd)       | Correlation with PISA scores | Mean (sd)                    | Correlation with PISA scores | Mean (sd)                        | Correlation with PISA scores | Difference in means Cohen's D (a) | Difference in correlations Z-score (b) |
|                                                                             |                           |                 |                              |                              |                              |                                  |                              |                                   |                                        |
| PISA scores                                                                 | 147                       | 475.9 (44.6)    | -                            | 497.5 (15.9)                 | -                            | 449.5 (53.5)                     | -                            | -1.273***                         | -                                      |
| Cumulative expenditure on education (\$)                                    | 108                       | 90,484 (34,108) | 0.418***                     | 96,429 (33,378)              | 0.156                        | 72,651 (30,322)                  | 0.906***                     | -0.728**                          | 1.234                                  |
| Student hours in classroom                                                  | 135                       | 26.8 (1.9)      | 0.025                        | 26.4 (1.4)                   | -0.010                       | 27.3 (2.4)                       | 0.240                        | 0.510*                            | -1.415                                 |
| Class size in language of instruction class                                 | 147                       | 27.3 (6.0)      | -0.451***                    | 23.8 (2.5)                   | -0.016                       | 31.6 (6.3)                       | -0.185                       | 1.678***                          | 1.010                                  |
| Public school enrolment rate (%)                                            | 141                       | 83.4 (17.0)     | 0.075                        | 83.0 (17.8)                  | -0.133                       | 83.8 (16.1)                      | 0.217                        | 0.032                             | -2.046*                                |
| Private expenditure on primary and secondary education (% of total)         | 105                       | 8.8 (6.1)       | -0.444***                    | 7.1 (5.2)                    | -0.003                       | 13.6 (6.1)                       | -0.666***                    | 1.182***                          | 3.413***                               |
| Teacher salaries (\$)                                                       | 102                       | 36,621 (25,776) | 0.567***                     | 45,441 (26,523)              | 0.381**                      | 22,373 (16,758)                  | 0.787***                     | -0.990***                         | -3.141**                               |
| Qualified teachers (%)                                                      | 138                       | 89.5 (9.2)      | 0.483***                     | 91.2 (5.9)                   | 0.155                        | 87.3 (11.9)                      | 0.515***                     | -0.435*                           | -2.352*                                |
| Teacher professional development in previous 3 months (%)                   | 147                       | 50.6 (16.5)     | 0.237**                      | 53.0 (17.0)                  | 0.211                        | 47.7 (15.5)                      | 0.216                        | -0.324                            | -0.031                                 |
| Average years of teacher experience                                         | 93                        | 16.6 (2.7)      | -0.106                       | 16.6 (2.5)                   | -0.148                       | 16.5 (3.2)                       | -0.127                       | -0.040                            | -0.095                                 |
| Teachers that participated in an induction program (%)                      | 93                        | 47.2 (19.5)     | 0.037                        | 41.2 (18.0)                  | -0.277*                      | 58.3 (17.4)                      | 0.632***                     | 0.963***                          | -4.563***                              |
| Teachers that have a mentor (%)                                             | 93                        | 11.4 (9.7)      | 0.095                        | 8.6 (6.1)                    | 0.216                        | 16.5 (12.8)                      | 0.305                        | 0.870**                           | -1.424                                 |
| Teacher non-contact hours (% of total)                                      | 87                        | 48 (11)         | 0.508***                     | 49 (7)                       | -0.095                       | 46 (17)                          | 0.658***                     | -0.240                            | -3.753***                              |

\*\*\*  $p < .001$ ; \*\*  $p < .01$ ; \*  $p < .05$

## NOTES

(a) Cohen's D magnitude of the difference between means, Welch two sample t-test for significance of difference

(b) Fisher's r to z transformation, and comparison of z-scores for the magnitude and significance of difference between correlations
