# Supplementary material
Source: MDPI journal article supplement (https://www.mdpi.com/2227-7102/11/1/10)
Supplement: s1 [file s1]

Table A6

| Comparison of means and correlations when grouped by level of income equality |                           |                 |                              |                                |                              |                                    |                              |                                   |                                        |
|-------------------------------------------------------------------------------|---------------------------|-----------------|------------------------------|--------------------------------|------------------------------|------------------------------------|------------------------------|-----------------------------------|----------------------------------------|
|                                                                               | All countries             |                 |                              | High income equality countries |                              | NOT high income equality countries |                              | Comparison between groups         |                                        |
|                                                                               | Number of tests in sample | Mean (sd)       | Correlation with PISA scores | Mean (sd)                      | Correlation with PISA scores | Mean (sd)                          | Correlation with PISA scores | Difference in means Cohen's D (a) | Difference in correlations Z-score (b) |
|                                                                               |                           |                 |                              |                                |                              |                                    |                              |                                   |                                        |
| PISA scores                                                                   | 147                       | 475.9 (44.6)    | -                            | 496.2 (26.6)                   | -                            | 453.1 (49.6)                       | -                            | -1.202***                         | -                                      |
| Cumulative expenditure on education (\$)                                      | 108                       | 90,484 (34,108) | 0.418***                     | 93,957 (28,414)                | 0.252*                       | 83,538 (42,946)                    | 0.512**                      | -0.307                            | -1.455                                 |
| Student hours in classroom                                                    | 135                       | 26.8 (1.9)      | 0.025                        | 26.5 (1.5)                     | 0.252*                       | 27.1 (2.3)                         | 0.121                        | 0.331                             | 0.770                                  |
| Class size in language of instruction class                                   | 147                       | 27.3 (6.0)      | -0.451***                    | 24.9 (3.6)                     | 0.018                        | 30.0 (7.0)                         | -0.412***                    | 0.936***                          | 2.702**                                |
| Public school enrolment rate (%)                                              | 141                       | 83.4 (17.0)     | 0.075                        | 82.3 (18.1)                    | -0.236*                      | 83.7 (16.0)                        | 0.283*                       | 0.026                             | -3.087**                               |
| Private expenditure on primary and secondary education (% of total)           | 105                       | 8.8 (6.1)       | -0.444***                    | 7.6 (5.1)                      | -0.050                       | 10.8 (7.2)                         | -0.591***                    | 0.535*                            | 3.011**                                |
| Teacher salaries (\$)                                                         | 102                       | 36,621 (25,776) | 0.567***                     | 41,377 (20,759)                | 0.606***                     | 31,865 (29,411)                    | 0.581***                     | -0.374                            | 0.189                                  |
| Qualified teachers (%)                                                        | 138                       | 89.5 (9.2)      | 0.483***                     | 92.0 (4.8)                     | 0.268*                       | 86.5 (12.0)                        | 0.459***                     | -0.619**                          | -1.266                                 |
| Teacher professional development in previous 3 months (%)                     | 147                       | 50.6 (16.5)     | 0.237**                      | 52.1 (15.0)                    | -0.010                       | 48.9 (17.9)                        | 0.343**                      | -0.192                            | -2.177*                                |
| Average years of teacher experience                                           | 93                        | 16.6 (2.7)      | -0.106                       | 16.2 (1.9)                     | 0.028                        | 17.2 (3.6)                         | -0.080                       | 0.367                             | 0.490                                  |
| Teachers that participated in an induction program (%)                        | 93                        | 47.2 (19.5)     | 0.037                        | 45.6 (21.9)                    | -0.112                       | 49.9 (14.8)                        | 0.353*                       | 0.223                             | -2.178*                                |
| Teachers that have a mentor (%)                                               | 93                        | 11.4 (9.7)      | 0.095                        | 10.3 (8.1)                     | 0.370**                      | 13.1 (11.7)                        | 0.030                        | 0.284                             | 1.622                                  |
| Teacher non-contact hours (% of total)                                        | 87                        | 48 (11)         | 0.508***                     | 51 (7)                         | -0.099                       | 43 (15)                            | 0.672***                     | -0.725**                          | -3.839***                              |

\*\*\*  $p < .001$ ; \*\*  $p < .01$ ; \*  $p < .05$

**NOTES**

(a) Cohen's D magnitude of the difference between means, Welch two sample t-test for significance of difference

(b) Fisher's r to z transformation, and comparison of z-scores for the magnitude and significance of difference between correlations
