# Supplementary material
Source: MDPI journal article supplement (https://www.mdpi.com/2227-7102/11/1/10)
Supplement: s1 [file s1]

| Country                      | 2015 PISA score |         |         | Reason for exclusion |                      |                                                     |                                    |                                |
|------------------------------|-----------------|---------|---------|----------------------|----------------------|-----------------------------------------------------|------------------------------------|--------------------------------|
|                              | Mathematics     | Reading | Science | Missing macro data   | Missing culture data | Non-representative PISA outcome (according to OECD) | Regional, not nation, PISA results | Administrative region of China |
| Algeria                      | 360             | 350     | 376     | X                    | X                    |                                                     |                                    |                                |
| Argentina                    | 409             | 425     | 432     |                      |                      | X                                                   |                                    |                                |
| BSJG (China)                 | 531             | 494     | 518     |                      |                      |                                                     | X                                  |                                |
| CABA (Argentina)             | 456             | 475     | 475     |                      |                      |                                                     | X                                  |                                |
| Chinese Taipei               | 542             | 497     | 532     | X                    | X                    |                                                     |                                    | X                              |
| Costa Rica                   | 400             | 427     | 420     |                      | X                    |                                                     |                                    |                                |
| Cyprus                       | 437             | 443     | 433     |                      | X                    |                                                     |                                    |                                |
| FYROM                        | 371             | 352     | 384     |                      | X                    |                                                     |                                    |                                |
| Georgia                      | 403             | 401     | 411     |                      | X                    |                                                     |                                    |                                |
| Hong Kong (China)            | 548             | 527     | 523     | X                    | X                    |                                                     |                                    | X                              |
| Israel                       | 470             | 479     | 467     |                      | X                    |                                                     |                                    |                                |
| Jordan                       | 380             | 408     | 409     | X                    |                      |                                                     |                                    |                                |
| Kazakhstan                   | 460             | 427     | 456     |                      |                      | X                                                   |                                    |                                |
| Kosovo                       | 362             | 347     | 378     | X                    | X                    |                                                     |                                    |                                |
| Lebanon                      | 396             | 347     | 386     | X                    |                      |                                                     |                                    |                                |
| Macao (China)                | 544             | 509     | 529     | X                    | X                    |                                                     |                                    | X                              |
| Malaysia                     | 446             | 431     | 443     |                      | X                    | X                                                   |                                    |                                |
| Malta                        | 479             | 447     | 465     | X                    |                      |                                                     |                                    |                                |
| Moldova                      | 420             | 416     | 428     |                      | X                    |                                                     |                                    |                                |
| Montenegro                   | 418             | 427     | 411     | X                    | X                    |                                                     |                                    |                                |
| Qatar                        | 402             | 402     | 418     | X                    | X                    |                                                     |                                    |                                |
| Trinidad and Tobago          | 417             | 427     | 425     | X                    |                      |                                                     |                                    |                                |
| Tunisia                      | 367             | 361     | 386     |                      | X                    |                                                     |                                    |                                |
| United Arab Emirates         | 427             | 434     | 437     | X                    | X                    |                                                     |                                    |                                |
| Average (excluded countries) | 435             | 427     | 439     |                      |                      |                                                     |                                    |                                |
